# Supplementary material for: Approaches to Sequence the HTT CAG Repeat Expansion and Quantify Repeat Length Variation
Source: PubMed Central journal article supplement — J Huntingtons Dis. 2021 Feb 9;10(1):53–74. doi: 10.3233/JHD-200433 (PMC7990409; doi:10.3233/jhd-200433), 2021-02-09
Supplement: jhd-10-jhd200433-s004.pdf [file jhd-10-jhd200433-s004.pdf]

## Supplementary file 1

### Estimation of the percentage of on-target and full-length reads for each experiment

To estimate the percentage of on-target and full-length reads for each experiment (*i.e.* a particular number of CAGs sequenced on a particular sequencing platform) we applied the following steps on sequencing reads obtained from one representative sample per experiment (the representative sample analysed was the cerebellum of the older mice):

Sequencing reads were first aligned (using BWA-MEM with default parameters as for all alignments mentioned below) to a reference sequence containing the 5'-flank and 1000 CAGs (Table SF1.1). Reads aligned to the 5'-flank were considered on-target and then aligned to a reference sequence containing the 3'-flank and 1000 CAGs (Table SF1.1).

Reads aligned to both flanks (determined based on the left-most alignment position) were considered full-length. Reads not aligned to the 5'-flank were aligned to the reference sequence containing the 3'-flank and 1000 CAGs (Table SF1.1). Reads aligned to at least one flank were considered on-target but not full-length. Reads not aligned to either flanks were then aligned to a pure CAG repeat reference sequence (Table SF1.1). Reads aligned to pure CAG repeat were considered on-target.

**Table SF1.1: Reference sequence used**

|                                                                                                                                                                                                                                                                                                     |
|-----------------------------------------------------------------------------------------------------------------------------------------------------------------------------------------------------------------------------------------------------------------------------------------------------|
| <b>&gt;5'-flank and 1000 CAGs</b><br>GCCCAGAGCCCCATTCATTGCCCCGGTGCTGAGCGGCGCCGCGAGTCGGCCCCGAGGCCTCCGGGGA<br>CTGCCGTGCCGGGCGGGAGACCGCCATGGCGACCCTGGAAAAGCTGATGAAGGCCTTCGAGTCCCT<br>CAAGTCCTTC (CAG) <sub>1000</sub>                                                                                  |
| <b>&gt;3'-flank and 1000 CAGs</b><br>GCCATCCCCGCCGTAGCCTGGGACCCGCCGGGACAGGGAGCTGCAGCGGGCCCAAACCTCACGGTTCG<br>GTGCAGCGGCTCCTCAGCCACAGCCGGGCCGGGTGGCGGGCGGGGCGGCGGCGGGGGCGGCTGCGG<br>CTGAGGCAGCAGCGGCTGTGCCTGCGGCGGGCGGCTGAGGAAGCTGAGGAGGCGGCGGGCGGCGGCGG<br>CGGCGGTGGCGGCTGTTG (CTG) <sub>1000</sub> |
| <b>&gt;pure CAG repeat</b><br>(CAG) <sub>1000</sub>                                                                                                                                                                                                                                                 |

Note: The 3'-flank and 1000 CAGs was considered in reverse complement orientation so that the 3'-flank would be on the left which then allowed to filter reads based on the POS column of the SAM alignment files which corresponds to the leftmost alignment position for a reads relatively to the reference sequence used.

Reads that did not align to either flanks, or to the pure CAG repeat reference sequence, were considered off-target. Assuming that the most likely source of off-target reads would be non-specific PCR of mouse DNA, the most likely source of the off-target reads was determined using Blastn {Johnson, 2008 #199} against all *Mus musculus* sequences available in NCBI Nucleotide collection (nr/nt) {Sayers, 2020 #198}. If no *Mus musculus* match was obtained, we attempted to determine the most likely source of the off-target reads using Blastn {Johnson, 2008 #199} against all sequences available in NCBI Nucleotide collection (nr/nt) {Sayers, 2020 #198}.

Result obtained are presented in Table SF1.2 below.

**Table SF1.2: Number and percentage of on-target and full-length reads as well as source of the off-target reads for each experiment**

| Experiment                  | Number of reads generated per sample | Number of reads on-target | Number of full-length reads | Number of reads off-target | Source of the off-target reads                                      |
|-----------------------------|--------------------------------------|---------------------------|-----------------------------|----------------------------|---------------------------------------------------------------------|
| ~ 55 CAG repeats on MiSeq   | 112,113                              | 111,873 (99.78%)          | 111,573 (99.52%)            | 240 (0.21%)                | 210 (0.19%) were primer-dimers and 30 (0.02%) remained unidentified |
| ~ 55 CAG repeats on PacBio  | 728                                  | 728 (100%)                | 720 (98.80%)                | 0                          | NA                                                                  |
| ~ 110 CAG repeats on MiSeq  | 5262                                 | 5262 (100%)               | 529 (10.05%)                | 0                          | NA                                                                  |
| ~ 110 CAG repeats on PacBio | 1716                                 | 1715 (99.94%)             | 1,561 (90.97%)              | 1 (0.06%)                  | <i>Mus musculus Foxe1</i> gene for forkhead box E1                  |
| ~ 255 CAG repeats on PacBio | 812                                  | 811 (99.88%)              | 541 (66.63%)                | 1 (0.12%)                  | <i>Mus musculus Foxe1</i> gene for forkhead box E1                  |
| ~ 470 CAG repeats on PacBio | 580                                  | 577 (99.48%)              | 419 (72.24%)                | 3 (0.52%)                  | <i>Mus musculus Foxe1</i> gene for forkhead box E1                  |

## References

- Johnson, M., I. Zaretskaya, Y. Raytselis, Y. Merezhuk, S. McGinnis *et al.*, 2008 NCBI BLAST: a better web interface. *Nucleic acids research* 36: W5-9.
- Sayers, E. W., J. Beck, J. R. Brister, E. E. Bolton, K. Canese *et al.*, 2020 Database resources of the National Center for Biotechnology Information. *Nucleic acids research* 48: D9-d16.
